# Supplementary material
Source: publisher figshare collection journal article supplement (https://tandf.figshare.com/ndownloader/files/13507376)
Supplement: Supplementary file 1 [file 13507376]

## Sheet: Bogaards selection of Pelke and
name	journal	journal_number	volume	year	Mention of the term "crucial", "likely", "deviant" or other type of case?	Reference to methods literature?	Mention of theory or hypothesis?	Explicit mention of "process tracing"?	Grounds for case selection	name of authors	topic	primary_research_interest	causal_claim	empirical_method	number_of_cases	cases_region	sample_selection	sampling rules_1	primary thematic focus_1	generalization	Note
ZAMBIA STARTS OVER	Journal of Democracy	1	3(2)	1992	No	No	No	No	First English-speaking in Africa country to make a peaceful transition to democracy	Michael Bratton	1	2	2	4	1	9	1	4	1	2
Top-Down Democratization in Tanzania	Journal of Democracy	1	10(4)	1999	No	No	No	No	New mode of transition: top-down democratization where the ruling party does not lose to opposition	Göran Hydén,	1	2	2	4	1	9	1	4	1	2
CAPE VERDE: AN AFRICAN EXCEPTION	Journal of Democracy	1	13(3)	2002	"exception"	No	No	No	Cape Verde is an exceptionally successful case of democratization in Africa	Peter Meyns	1	2	2	4	1	9	1	4	1	2
PLURALISM BY DEFAULT IN MOLDOVA	Journal of Democracy	1	13(4)	2002	No	No	No	No	Reinterpretation of Moldova: Democracy as failed attempt at authoritarianism	Lucan A. Way	1	2	2	4	1	2	1	4	1	2
PREEMPTING DEMOCRACY: THE CASE OF BELARUS	Journal of Democracy	1	16(4)	2005	No	No	No	No	Story of how democracy was preempted in Belarus	Vitali Silitski	1	2	2	4	1	2	1	4	1	2
WHAT REALLY HAPPENED IN KYRGYZSTAN?	Journal of Democracy	1	17(2)	2006	No	No	No	No	Story of Kyrgyz revolution	Scott Radnitz	1	2	2	4	1	2	1	4	1	2
Interactive Society and Democracy: Civil Society and Pluralism in Africa Revisited	Democratization	2	8(3)	2001	No	No	No	No	Examination of relation between civil society and democracy, with case of Zimbabwe	Rosemary H. T. O’Kane	1	3	2	4	1	9	1	4	1	1
Dancing in the Dark: The European Union and the Algerian Drama	Democratization	2	9(1)	2002	No	No	No	No	Failure of European foreign policy towards Algeria	Hugh Roberts	1	2	2	4	1	8	1	4	1	2
Parties, Protest and Pluralism in Cambodia	Democratization	2	9(3)	2002	No	No	No	No	Party strategies in Cambodia and regime impact	Caroline Hughes	1	2	2	4	1	6	1	4	1	1
The politics of judicial review in Chile in the era of democratic transition, 1990–2002	Democratization	2	10(4)	2003	No	No	No	No	Judicial review in the transition to democracy in Chile	Javier Couso	1	2	2	4	1	4	1	4	1	1
Assessing democracy from below: A framework and indonesian pilot study	Democratization	2	13(2)	2006	"critical", but the term does not seem to be used in a methodological sense	No	No	No	Indonesian democracy audit	Olle Toernquist	1	3	2	4	1	6	1	4	1	2
Democratic Development in Costa Rica	Democratization	2	15(4)	2008	deviant	No	Yes	No	Costa Rica as a deviant democracy	John A. Booth	1	2	2	4	1	4	1	4	1	2
Deviant Democratization in India	Democratization	2	15(4)	2008	deviant	No	Yes	No	India as a deviant democracy	Alistair McMillan	1	2	2	4	1	7	1	4	1	2
Mongolia: The Rise and Travails of a Deviant Democracy	Democratization	2	15(4)	2008	deviant	No	No	No	Mongolia as a deviant democracy	Verena Fritz	1	2	2	4	1	7	1	4	1	2
Democratic Transition and Democratic Survival in Benin	Democratization	2	15(4)	2008	deviant	Lijphart 1971, 1979	Yes	No	Benin as a deviant democracy	Rachel Gisselquist	1	2	2	4	1	9	1	4	1	2
Why there is no party ban in the South African constitution	Democratization	2	17(4)	2010	No	No	Yes	No	Absence of ethnic party ban in South Africa	Joerg Kemmerzell	1	2	2	4	1	9	1	4	1	2
The state-in-society approach to the study of democratization with examples from Japan	Democratization	2	17(5)	2010	most-likely & least-likely	No	Yes	No	Civil society and democracy in Japan	Mary Alice Haddad	1	3	2	4	1	5	1	4	1	1
Questioning Tocqueville in Africa: continuity and change in civil society during Nigeria's democratization	Democratization	2	18(1)	2011	"useful"	No	Yes	No	Critique of Tocqueville's idea of civil society using democracy in Nigeria	A. Carl LeVan	1	3	2	4	1	9	1	4	1	1
Dynamics of peace and democratization. The Aceh lessons	Democratization	2	18(3)	2011	"critical"	George and Bennett 2005	Yes	No	Theories of democratization and peace tested in Aceh	Olle Törnquist	1	2	2	4	1	6	1	4	1	2
Financing poverty alleviation vs. promoting democracy? Multi-Donor Budget Support in Zambia	Democratization	2	19(3)	2012	typical	No	No	No	Budget support and democracy in Zambia	Jörg Faust , Stefan Leiderer, Johannes Schmitt	1	2	2	4	1	9	1	4	1	1
Power-sharing and democracy promotion in post-civil war peace-building	Democratization	2	19(3)	2012	crucial	Eckstein 1975 & Gerring 2007	Yes	No	Power-sharing and democratization in Bosnia-and-Herzegovina	Jai Kwan Jung	1	3	2	4	1	2	1	4	1	1
Moderation of religious and secular politics, a country's “centre” and democratization	Democratization	2	21(2)	2014	No	No	Yes	No	Moderation and democracy in Turkey	Murat Somer	1	3	2	4	1	8	1	4	1	1
Democratization and the secularization of religious parties: the case of Mexico	Democratization	2	23(3)	2016	"crucial", but only in the abstract	George and Bennett 2005	Yes		Democratization (IV) and the secularization of religious parties in Mexico	Luis Felipe Mantilla	1	2	2	4	1	4	1	4	1	2
Classing Ethnicity: Class, Ethnicity, and the Mass Politics of Taiwan's Democratic Transition	world politics	3	59 (4)	2007	No	No	Yes	No	Reinterpretation of Taiwan's democratization, focusing on the working class	David D. Yang	1	3	2	4	1	5	1	4	1	2
Force and Federalism: Controlling Coercion in Federal Hybrid Regimes	Comparative Politics	4	39 (4)	2007	"Plausability probe" of a "significant" case	Yes	Yes	No	Theoretical and practical reasons to look at Russia	Brian D. Taylor	1	3	2	4	1	2	1	4	4	2
Who Sues Government?: Evidence From the Moscow Theater Hostage Case	Comparative Political Studies	5	40 (7)	2007	"Ideal case" (quantitative)	No	Yes	No	What makes Russia ideal is mostly the availability of data	Debra Javeline, Vanessa Baird	1	3	2	4	1	2	1	4	4	2
Sustaining Gendered Practices? Power, Parties, and Elite Political Networks in Argentina	Comparative Political Studies	5	47 (1)	2014	NA: Quantitative case study	No	Yes	No	Women in parliament in Argentina, the first country to adopt gender quotas	Susan Franceschet, Jennifer M. Piscopo	1	3	2	4	1	4	1	4	4	2	Not included in the analyisis because it is a quantitative case study
Paths to peace in Northern Ireland (I): Civil society and consociational approaches	Democratization	2	4(2)	1997	No	No	Yes	No	Two interpretations of peace and conflict in Northern Ireland compared	Paul Dixon	1	2	2	4	1	1	1	4	4	2	This is one article in two parts
Paths to peace in Northern Ireland (II): The peace processes 1973–74 and 1994–96	Democratization	2	4(3)	1997	No	No	Yes	No	Two interpretations of peace and conflict in Northern Ireland compared	Paul Dixon	1	2	2	4	1	1	1	4	4	NA	This is one article in two parts
The quality of democracy: Mass-elite linkages in the Czech republic	Democratization	2	4(4)	1997	No	No	Yes	No	Not clear why the focus is on the Czech republic	Andrew T. Green, Carol Skalnik Leff	1	2	2	4	1	2	1	4	4	1
Cross-cutting issues and the consolidation of democracy in Taiwan	Democratization	2	5(4)	1998	No	No	Yes	No	Not clear why Taiwan is chosen for an analysis of cross-cutting cleavages and democratic consolidation	Tse-min Lin, Baohui Zhang	1	2	2	4	1	5	1	4	4	1
Botswana: A Minimalist Democracy	Democratization	2	15(4)	2008	Deviant	No	Yes	No	Botswana as a deviant democracy	Kenneth Good, Ian_x000D__x000D_ Taylor	1	2	2	4	1	9	1	4	4	2
Institutionalizing the pro-democracy movements: the case of Zambia's Movement for Multiparty Democracy	Democratization	2	18(5)	2011	"Best-case scenario" (as in: most promising to succeed)	No	Yes	No	Democratic consolidation in Zambia	Lise Rakner	1	2	2	4	1	9	1	4	4	2
Room to Maneuver in the Middle: Local Elites, Political Action, and the State in India	world politics	3	43 (3)	1991	NA: Quantitative case study	No	Yes	No	Not clear why the theory about protest is examined with Indian data	Subrata Kumar Mitra	1	3	2	4	1	7	1	4	4	1	Not included in the analyisis because it is a quantitative case study
Crucial case studies

## Sheet: Sheet1
name	journal	journal_number	volume	year	Case selection	Explicit mention of Mill and/or "method of agreement", "method of difference", "most similar", "most different" research design?	Theoretical contribution?	Explicit mention of "process tracing"?	Theme	name of authors	topic	primary_research_interest	causal_claim	empirical_method	number_of_cases	sample_selection	sampling rules_1	primary thematic focus_1	generalization	Note
Combining Alternative Perspectives: Internal Trajectories versus External Influences as Explanations of Latin American Politics in the 1940s	Comparative Politics	4	26 (1)	1993	Polar types	Lijphart 1971; Przeworski and Teune 1970 and two more	Yes	No	Test of two theories of changes in domestic politics using four country comparison in Latin America	Ruth Berins Collier	1	3	2	3	3	1	3	1	2
State, Society, and Political Change in China and Hungary	Comparative Politics	4	26 (3)	1994	Implicit Most Similar	No	Yes	No	Civil society and regime change in Hungary and China	Yanqi Tong	1	3	2	3	2	1	3	1	2
Women's Movements and Democratic Transition in Chile, Brazil, East Germany, and Poland	Comparative Politics	4	35 (3)	2003	Selection on the dependent variable (success/failure)	No	Yes	No	Women's movements and democratic transition in Chile, Brazil, East Germany, and Poland	Lisa Baldez	1	3	2	3	3	1	3	1	2
Linkage versus Leverage. Rethinking the International Dimension of Regime Change	Comparative Politics	4	38 (4)	2006	Illustration of causal mechanism	No	Yes	No	Linkage and leverage, with examples from 4 countries	Steven Levitsky and Lucan A. Way	1	3	2	3	3	1	3	1	1
Transitions to Democracy and Internal Party Rules: Spain in Comparative Perspective	Comparative Politics	4	39 (1)	2006	Not clear	No	Yes	No	Small N comparison of impact of pacted transition on parties	Bonnie N. Field	1	3	2	3	3	1	3	1	2
Corporatism, Totalitarianism, and Transitions to Democracy	Comparative Political Studies	5	27 (1)	1994	Implicit diverse cases	No	Yes	No	Comparison of four authoritarian countries to show how corporatist background facilitates pacted transitions	Baohui Zhang	1	3	2	3	3	1	3	1	2
A Politics of Institutional Choice: Post-Communist Presidencies	Comparative Political Studies	5	30 (5)	1997	Implicit Most Similar	No	Yes	No	Comparison of post-communist presidencies	Timothy Frye	1	3	2	3	3	1	3	1	1
After the Break-up: Institutional Design in Transitional States	Comparative Political Studies	5	33 (5)	2000	Implicit Most Similar	No	Yes	No	Transitions and institutional design in 3 Central Asian countries	Pauline Jones Luong	1	3	2	3	3	1	3	1	2
Virtual Legality: Authoritarian Legacies and the Reform of Military Justice in Brazil, the Southern Cone, and Mexico	Comparative Political Studies	5	34 (5)	2001	"structured focused comparison"	No	Yes	No	Test of three theories of courts after transition in 4 Latin American countries	Anthony W. Pereira	1	3	2	3	3	1	3	1	2
Democratization and the Left: Comparing East Asia and Latin America	Comparative Political Studies	5	37 (10)	2004	Implicit Comparative Area Studies	No	Yes	No	The Left after democratization in 2 Latin American and 2 Asian countries	Joseph Wong	1	3	2	3	3	1	3	1	1
Free Politics and Free Markets in Latin America	Journal of Democracy	1	9(4)	1998	Not clear	No	Yes	No	Free politics and free markets in Latin America	Jorge I. Domínguez	1	2	2	3	3	1	3	1	1
The Politics of Second-Generation Reform	Journal of Democracy	1	10(3)	1999	Not clear	No	No	No	Market reform in 3 Latin American democracies	Manuel Pastor, Jr.	1	2	2	3	3	1	3	1	1
A Tale of Three Countries	Journal of Democracy	1	10(4)	1999	Positive versus negative cases	No	No	No	Asia's economic crisis and democracy in 4 countries	Donald K. Emmerson	1	2	2	3	3	1	3	1	2
Strong-state Democratization in Malaysia and Singapore	Journal of Democracy	1	23(2)	2012	Implicit Parallel Demonstration of Theory	No	Yes	No	Strong state democratization in Malaysia and Singapore	Dan Slater	1	2	2	3	2	1	3	1	2
Democratization Theory and the “Arab Spring”	Journal of Democracy	1	24(2)	2013	Positive versus negative cases	No	Yes	No	Arab spring, with focus on Tunisia and Egypt	Alfred Stepan, Juan J. Linz	1	3	2	3	2	1	3	1	1
Transforming the Arab World’s Protection-Racket Politics	Journal of Democracy	1	24(3)	2013	Positive versus negative cases	No	No	No	Arab Spring, with focus on Tunisia and Egypt	Daniel Brumberg	1	2	2	3	2	1	3	1	2
Gatekeepers and Linkages	Journal of Democracy	1	25(4)	2014	Implicit Most Similar	No	Yes	No	Gatekeepers and linkage in Belarus and Ukraine	Jakob Tolstrup	1	3	2	3	2	1	3	1	1
Democratization and communal politics	Democratization	2	5(1)	1998	Implicit Most Similar	No	Yes	No	Democratization and communal politics in Algeria and South Africa	Badredine Arfi	1	3	2	3	2	1	3	1	1
The Challenge of Democracy in North Africa	Democratization	2	9(1)	2002	No	No	No	No	Prospects for democracy in Morrocco, Tunisia, and Algeria	Bechir Chourou	1	2	2	3	3	1	3	1	2
External-Internal Linkages in Democratization: Developing an Open Model of Democratic Change	Democratization	2	9(2)	2002	Implicit Most Similar	No	Yes	No	International factors and democratization in Portugal, Spain, and Turkey	Hakan Yilmaz	1	3	2	3	3	1	3	1	1
A Comparative Analysis of Political Parties in Kenya, Zambia and the Democratic Republic of Congo	Democratization	2	9(3)	2002	Implicit Most Similar	No	Yes	No	Parties and democracy in Zambia, Kenya, and DRC	Sabine Carey	1	2	2	3	3	1	3	1	2
Economic Reforms and Ethnic Nationalism in the Context of Transition to Democracy: The Case of Four Eastern European Nations	Democratization	2	9(4)	2002	Implicit Most Similar	No	Yes	No	Nationalism and economic reform in 4 East European countries	Vladimir Pigenko, Cristina Novac	1	2	2	3	3	1	3	1	1
Beyond Pacted Transitions in Spain and Chile: Elite and Institutional Differences	Democratization	2	10(2)	2003	Not clear	No	Yes	No	Comparison of transitions in Chile and Spain	Omar Sanchez	1	2	2	3	2	1	3	1	2
The accountability function of the courts in Tanzania and Zambia	Democratization	2	10(4)	2003	Implicit Most Similar	No	No	No	Courts in Tanzania and Zambia	Siri Gloppen	1	2	2	3	2	1	3	1	2
Why Hungary and Poland differed in 1989: The role of medium-term frames in explaining the outcomes of democratic transition	Democratization	2	13(1)	2006	Implicit Most Similar	No	Yes	No	Transition in Poland and Hungary	Alan Renwick	1	2	2	3	2	1	3	1	1
Transition modes and post-transition inter-party politics: Evidence from Spain (1977–82) and Argentina (1983–89)	Democratization	2	13(2)	2006	Implicit Most Similar	No	Yes	No	Transition modes and party politics in Argentina and Spain	Bonnie N. Field	1	2	2	3	2	1	3	1	2
Political Elites and Democratic State-building Efforts in Bosnia and Iraq	Democratization	2	13(5)	2006	Implicit Most Different	No	Yes	No	External actors and democracy in Iraq and Bosnia	Carrie Manning	1	2	2	3	2	1	3	1	1
Democracy Assistance to Domestic Election Monitoring Organizations: Conditions for Success	Democratization	2	14(2)	2007	Implicit Most Similar	No	Yes	No	International support for domestic election monitors in 4 Latin American countries	Sharon F. Lean	1	2	2	3	3	1	3	1	1
The Perils and Promises of Democratization through United Nations Transitional Authority – Lessons from Cambodia and East Timor	Democratization	2	15(3)	2008	Not clear	No	Yes	No	The UN and democracy in East Timor and Cambodia	Aurel Croissant	1	2	2	3	2	1	3	1	1
Late lustration programmes in Romania and Poland: supporting or undermining democratic transitions?	Democratization	2	16(2)	2009	Not clear	No	Yes	No	What explains late lustration in Poland and Romania?	Cynthia M. Horne	1	2	2	3	2	1	3	1	1
The multi-faceted role of religious actors in democratization processes: empirical evidence from five young democracies	Democratization	2	16(6)	2009	Desire for variation on key variables	No	Yes	No	Religious actors and democratization in 6 countries	Mirjam Kuenkler and Julia Leininger	1	2	2	3	3	1	3	1	1
Democratizing state–religion relations: a comparative study of Turkey, Egypt and Israel	Democratization	2	16(6)	2009	Not clear	No	Yes	No	The relationship between state, religion, and democracy in Turkey, Egypt, and Israel	Amal Jamal	1	2	2	3	3	1	3	1	1
Exploring USAID's democracy promotion in Bosnia and Afghanistan: a ‘cookie-cutter approach’?	Democratization	2	17(1)	2010	Implicit Most Different	No	Yes	No	USAID and democracy in Afghanistan and Bosnia	Matthew Alan Hill	1	2	2	3	2	1	3	1	1
Challenges to democracy building and the role of civil society	Democratization	2	17(3)	2010	Implicit selection on the dependent variable	No	Yes	No	Civi society and democracy in Macedonia, Albania, and Bulgaria	Tina Mavrikos-Adamou	1	2	2	3	3	1	3	1	2
Comparing ethnic party regulation in East Africa	Democratization	2	17(4)	2010	Implicit Most Similar	No	Yes	No	Ethnic party bans in Kenya, Tanzania, and Uganda	Anika Moroff	1	2	2	3	3	1	3	1	2
Party politics in Georgia and Ukraine and the failure of Western assistance	Democratization	2	17(6)	2010	Not clear, selection of negative cases	No	No	No	Party assistance in Georgia and Ukraine	Max Bader	1	2	2	3	2	1	3	1	2
Sons of war’: parties and party systems in post-war El Salvador and Cambodia	Democratization	2	17(6)	2010	Implicit Most Similar	No	Yes	No	Legacies of civil war on parties in El Salvador and Cambodia	Jeroen de Zeeuw	1	2	2	3	2	1	3	1	1
Intelligence reform in new democracies: factors supporting or arresting progress	Democratization	2	18(3)	2011	Implicit Most Similar	No	Yes	No	Intelligence reform in Brazil and Romania	Florina Cristiana Matei, Thomas Bruneau	1	3	2	3	2	1	3	1	1
Endogenizing legislative candidate selection procedures in nascent democracies: evidence from Spain and Chile	Democratization	2	18(3)	2011	Explicit Most Different	Brady and Collier 2004; George and Bennett 2005	Yes	No	Candidate selection in two new democracies (Spain and Chile)	Bonnie N. Field & Peter M. Siavelis	1	2	2	3	2	1	3	1	1
From Brussels with love: leverage, benchmarking, and the action plans with Jordan and Tunisia in the EU's democratization policy	Democratization	2	18(4)	2011	"different-case comparison"	No	No	No	EU democracy promotion in Tunisia and Jordan	Raffaella A. Del Sarto, Tobias Schumacher	1	2	2	3	2	1	3	1	1
Decentralization and political opposition in contemporary Africa: evidence from Sudan and Ethiopia	Democratization	2	18(5)	2011	Explicit Most Similar	Yes	Yes	No	Decentralisation and democratic opposition parties in Sudan and Ethiopia	Elliott Green	1	2	2	3	2	1	3	1	1
Do new democracies deliver social welfare? Political regimes and health policy in Ghana and Cameroon	Democratization	2	19(2)	2012	Implicit Most Similar	No	Yes	No	Regime type and welfare policy in Ghana and Cameroon	Giovanni Carbone	1	2	2	3	2	1	3	1	1
Coerced transitions in Timor-Leste and Kosovo: managing competing objectives of institution-building and local empowerment	Democratization	2	19(3)	2012	Implicit Most Different	No	No	No	Coerced transitions in East Timor and Kosovo	Nicolas Lemay-Hébert	1	2	2	3	2	1	3	1	1
Explaining (and re-explaining) political change in the Middle East during the Arab Spring: trajectories of democratization and of authoritarianism in the Maghreb	Democratization	2	20(6)	2013	Region	No	Yes	No	Arab Spring	Frédéric Volpi	1	3	2	3	3	1	3	1	1
Not as bad as it seems: EU and US democracy promotion faces China in Africa	Democratization	2	22(3)	2015	Two most-likely cases	No	Yes	No	Democracy promotion in Angola and Ethiopia	Christine Hackenesch	1	2	2	3	2	1	3	1	2
Infrastructural state capacity for democratization? Voter registration and identification in Côte d'Ivoire and Ghana compared	Democratization	2	23(3)	2016	Positive versus negative cases	No	Yes	No	State capacity and democratization	Giulia Piccolino	1	2	2	3	2	1	3	1	2
Regime Cycles: Democracy, Autocracy, and Revolution in Post-Soviet Eurasia	world politics	3	58 (1)	2005	10+ cases	n.a.	n.a.	No	n.a.	Henry E. Hale	1	3	2	3	3	1	3	1	1
FORMAL CONSTITUTIONS IN INFORMAL POLITICS: Institutions and Democratization in Post-Soviet Eurasia	world politics	3	63 (4)	2011	Implicit Most Similar	George and Bennett 2005; Tarrow 2010	Yes	Yes	Institutions and democratization in Kyrgyzstan and Ukraine	HENRY E. HALE	1	3	2	3	2	1	3	1	2
Can the "Halfway House" Stand? Semidemocracy and Elite Theory in Three Southeast Asian Countries	Comparative Politics	4	28 (4)	1996	Not specified (typical cases?)	No	Yes	No	Arguing that three semi-democracies in Asia can be stable	No	William F. Case	1	3	2	3	3	1	3	4
Contesting Citizenship: Indigenous Movements and Democracy in Latin America	Comparative Politics	4	31 (1)	1998	(Almost) whole population	No	Yes	No	Ethnic politicization in Latin America	No	Deborah J. Yashar	1	3	2	3	4	1	3	4
Assessing the Consequences of Electoral Democracy: Subnational Legislative Change in Mexico	Comparative Politics	4	33 (4)	2001	Mexico as least likely case, three regions follow implicit Most Similar	No	Yes	No	Competitive elections and legislative institutionalization	Yes	Caroline Beer	1	3	2	3	3	1	3	4
The Politics of Deepening Local Democracy: Decentralization, Party Institutionalization, and Participation	Comparative Politics	4	39 (2)	2007	Implicit Most Similar	No	Yes	No	Experiments with municipal democracy in three Latin American countries	No	Benjamin Goldfrank	1	3	2	3	3	1	3	4
Negotiating Welfare in Postcommunist States	Comparative Politics	4	40 (1)	2007	Implicit Most Similar	No	Yes	No	Postcommunist welfare states in three countries	Sort of	Linda J. Cook	1	3	2	3	3	1	3	4
Latin American Catholicism in an Age of Religious and Political Pluralism: A Framework for Analysis	Comparative Politics	4	40 (2)	2008	"modal cases"	No	Yes	No	Political pluralism and the Catholic Church in Latin America	No	Frances Hagopian	1	3	2	3	3	1	3	4
Does Democracy Check Corruption? Insights from China and India	Comparative Politics	4	42 (1)	2009	Implicit Most Similar	No	Yes	No	Corruption in China and India	No	Yan Sun and Michael Johnston	1	3	2	3	2	1	3	4
From Argument to Negotiation: Constructing Democracy in African Muslim Contexts	Comparative Politics	4	42 (4)	2010	Implicit deviant case	No	Yes	No	Democracy and islam in three West African countries	No	Leonardo A. Villalón	1	3	2	3	3	1	3	4
Agents or Actors? Assessing the Autonomy of Economic Technocrats in Colombia and Peru	Comparative Politics	4	43 (3)	2011	Implicit Most Different	No	Yes	No	Technocrats in two Latin American countries	No	Eduardo Dargent	1	3	2	3	2	1	3	4
Patronage as Institutional Choice: Evidence from Rwanda and Uganda	Comparative Politics	4	43 (4)	2011	Implicit Most Similar	Gerring 2007	Yes	No	Patronage in two African countries	Sort of	Elliott Green	1	3	2	3	2	1	3	4
International Norms, Domestic Politics, and the Death Penalty: Comparing Japan, South Korea, and Taiwan	Comparative Politics	4	44 (1)	2011	Implicit Most Similar	No	Yes	No	Human Rights' norms in three Asian democracies	No	Sangmin Bae	1	3	2	3	3	1	3	4
The Authoritarian Advantage of Horizontal Accountability: Ombudsmen in Poland and Russia	Comparative Politics	4	44 (3)	2012	Implicit Most Similar	No	Yes	No	Ombudsman in two East European countries	No	Evgeny Finkel	1	3	2	3	2	1	3	4
Rituals of Respect: Sufis and Secularists in Senegal in Comparative Perspective	Comparative Politics	4	44 (4)	2012	Generalization of case	No	Yes	No	Senegal's Muslims in comparative perspective	Yes	Alfred Stepan	1	3	2	3	3	1	3	4
Crafting Courts in New Democracies: Ideology and Judicial Council Reforms in Three Mexican States	Comparative Politics	4	44 (4)	2012	Explicit Most Similar	Przeworski and Teune 1970	Yes	Yes	Judicial reform in three Mexican states	No	Matthew C. Ingram	1	3	2	3	3	1	3	4
Subnational Islamization through Secular Parties: Comparing "Shari'a" Politics in Two Indonesian Provinces	Comparative Politics	4	46 (1)	2013	Implicit Most Different	No	Yes	No	Islamization by secular parties in two Indonesian provinces	No	Michael Buehler	1	3	2	3	2	1	3	4
Beyond the Secularism Trap: Religion, Political Institutions, and Democratic Commitments	Comparative Politics	4	47 (4)	2015	Implicit deviant cases	No	Yes	No	Religion and democracy in Ireland and Senegal	Yes	David T. Buckley	1	3	2	3	2	1	3	4
The Strong State as a Problem for the Consolidation of Democracy: Turkey and Germany Compared	Comparative Political Studies	5	25 (2)	1992	"Polar types"	No	Yes	No	State strength in Germany and Turkey compared		Metin Heper	1	3	2	3	2	1	3	4
The Dynamics of Public Support for Coalition Governments	Comparative Political Studies	5	28 (3)	1995	n.a.	n.a.	n.a.	n.a.	n.a.		Christopher J. Anderson	1	3	2	3	2	1	3	4	This study is not about democratic consolidation, not even broadly conceived
Decentralization as an Electoral Strategy	Comparative Political Studies	5	36 (9)	2003	Mixed methods: regression plus paired comparisons	No	Yes	No	Political parties and decentralization policies in Latin America	Yes (but only for the quantitative part of the analysis)	Kathleen O'Neill	1	3	2	3	3	1	3	4
The Power Knocks at the Courts' Back Door: Two Waves of Postcommunist Judicial Reforms	Comparative Political Studies	5	42 (6)	2009	Implicit Most Similar	No	Yes	No	Courts in three post-communist Central European countries	Yes	Daniela Piana	1	3	2	3	3	1	3	4
Combining Federalism and Decentralization: Comparative Case Studies on Regional Development Policies in Switzerland, Austria, Denmark, and Ireland	Comparative Political Studies	5	45 (4)	2012	Mixed methods: regression plus studies of "average" (= typical) cases	Yes	Yes	No	Decentralization and policy-making in four West European countries	Yes (but only for the quantitative part of the analysis)	Jan Biela, Annika Hennl, André Kaiser	1	3	2	3	3	1	3	4
The generosity moment: Ethnic politics, democratic consolidation and the state in Yugoslavia (Croatia), South Africa and Czechoslovakia	Democratization	2	5(1)	1998	Implicit Most Similar	No	Yes	No	Power sharing in three ethnically divided societies	Yes	Robert Hislope	1	2	2	3	3	1	3	4
The role of actors and institutions: The difficulties of democratic survival in Mali and Niger	Democratization	2	6(2)	1999	Implicit Most Similar	No	Yes	No	Democratic survival in two African countries	No	Sophia Moestrup	1	2	2	3	2	1	3	4
Political Parties and Democratization in the Southern Cone of Latin America	Democratization	2	9(3)	2002	Implicit Most Different	No	Yes	No	Parties and democracy in Latin America, with a focus on Argentina and Chile	Yes (but only for a statistical test that is a minor part of the paper)	Roberto Espíndola,	1	2	2	3	2	1	3	4
How important are new constitutions for democratic consolidation? Lessons from the post-communist states	Democratization	2	11(3)	2004	Implicit Most Different	No	Yes	No	Democratic consolidation and constitutions in three Central European countries	No	Allison Stanger	1	3	2	3	3	1	3	4
Churches and the consolidation of democratic culture: difference and convergence in the Czech Republic and Hungary	Democratization	2	11(4)	2004	Implicit Most Similar	No	Yes	No	How democracy affects church-state relations in two Central European countries	No	Zsolt Enyedi, Joan O'Mahony	1	2	2	3	2	1	3	4
The legacies of transition governments: post-transition dynamics in Benin and Togo	Democratization	2	12(3)	2005	Implicit Most Similar	No	Yes	No	Transitions in two West African countries	No	Jennifer C. Seely	1	2	2	3	2	1	3	4
The limits to democracy posed by oil rentier states: The cases of Algeria, Nigeria and Libya	Democratization	2	13(1)	2006	Congruence analysis	No	Yes	No	Resource curse and democracy in three African countries	Yes	Camilla Sandbakken	1	2	2	3	3	1	3	4
What a Little Democracy Can Do: Comparing Trajectories of Reform in Malaysia and Indonesia	Democratization	2	14(1)	2007	Implicit Most Similar	No	Yes	No	Political openings and opposition organization in two Asian countries	Yes	Meredith Weiss	1	2	2	3	2	1	3	4
Electoral Systems and the Number of Parties in Postcommunist States	world politics	3	51 (3)	1999	Implicit typical cases	No	Yes	No	Political consequences of electoral systems in five post-communist countries	Yes	Robert G. Moser	1	3	2	3	3	1	3	4
Runaway State Building: How Political Parties Shape States in Postcommunist Eastern Europe	world politics	3	56 (4)	2004	Implicit Most Similar	No	Yes	No	Patronage politics in three post-communist countries	Yes	Conor O'Dwyer	1	2	2	3	3	1	3	4
Authoritarian State Building and the Sources of Regime Competitiveness in the Fourth Wave: The Cases of Belarus, Moldova, Russia, and Ukraine	world politics	3	57 (2)	2005	Implicit Most Similar	No	Yes	No	Regime trajectories in four East European states	No	Lucan A. Way	1	3	2	3	3	1	3	4
Path Shifting of the Welfare State Electoral Competition and the Expansion of Work-Family Policies in Western Europe	world politics	3	65 (1)	2013	n.a.	n.a.	n.a.	n.a.	n.a.		Kimberly J. Morgan	1	2	2	3	3	1	3	4	This study is not about democratic consolidation, not even broadly conceived
Small N comparisons using Mill's methods
